# Supplementary material for: Identification of the Primary Structure of Selenium-Containing Polysaccharides Selectively Inhibiting T-Cell Proliferation
Source: MDPI journal article supplement (doi:10.3390/molecules26175404), 2021-09-06
Supplement: s1 [file s1]

## Supporting Information

Table S1.

SEC analysis (RI, RALS, LALS, and visc) of analyzed products

| Sample   | Ret. vol.<br>[mL] | $M_n$              | $M_w$              | $\bar{D}$ | Remarks                                           |
|----------|-------------------|--------------------|--------------------|-----------|---------------------------------------------------|
| Se-Le-30 | 18.58             | $1.69 \times 10^6$ | $3.62 \times 10^6$ | 2.15      | Bimodal<br>signal for all<br>detectors            |
| A/B-C    | 18.48             | $1.72 \times 10^6$ | $2.18 \times 10^6$ | 1.27      | Bimodal<br>signal for LS<br>and visc<br>detectors |
| A        | 18.49             | $1.82 \times 10^6$ | $2.25 \times 10^6$ | 1.24      | Bimodal<br>signal for LS<br>detectors             |
| B-C      | 20.05             | $5.06 \times 10^4$ | $1.10 \times 10^5$ | 2.18      | Bimodal<br>signal for LS<br>detectors             |

The OmniSEC calculation was based on glucan standard (glu-245).  $\bar{D}$  (dispersity) represents  $M_w/M_n$

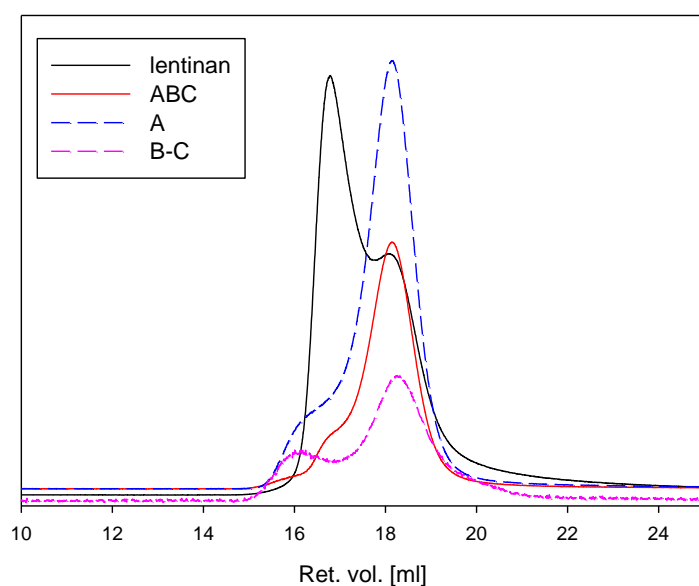

Figure S1. RALS traces for *Se-Le-30* and fractions A, A/B-C, and B-C.

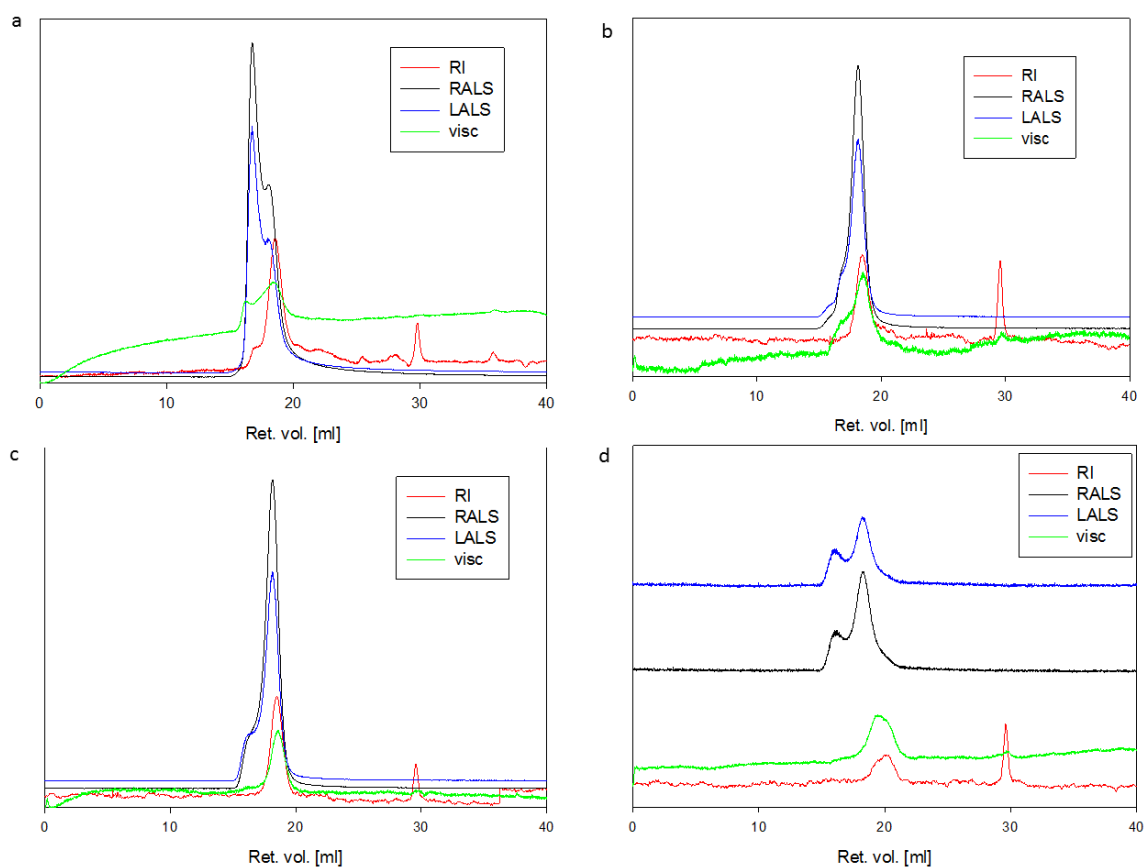

Figure S2. SEC traces. (a) *Se-Le-30*; (b) *A/B-C* fraction; (c) *A* fraction; (d) *B-C* fraction

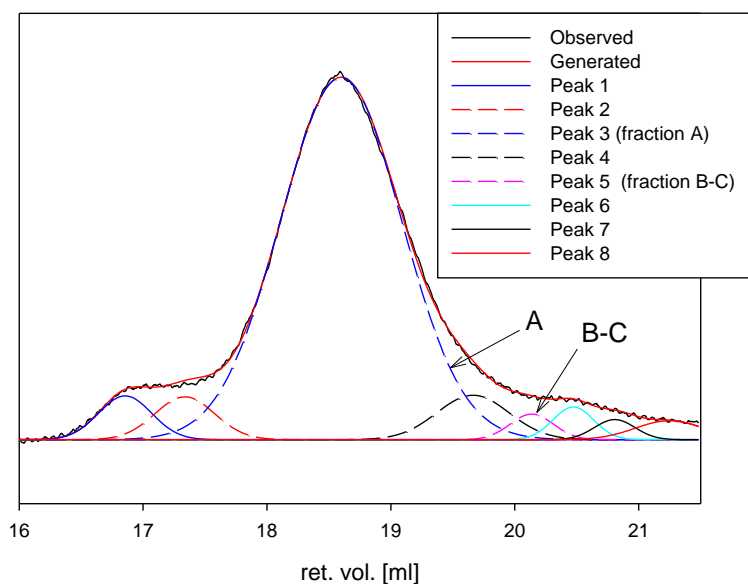

Figure S3. Deconvolution of the *Se-Le-30* RI signal. Curves corresponding to fractions *A* and *B-C* are marked by arrows.

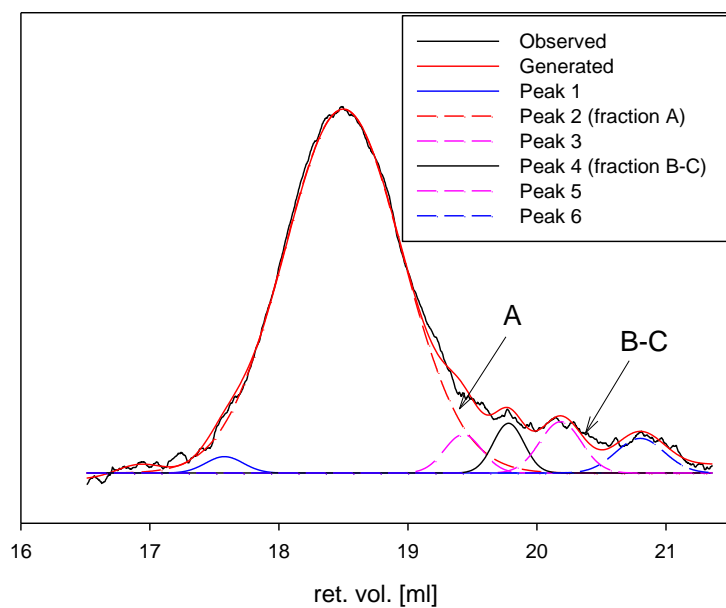

Figure S4. Deconvolution of the RI signal of product *A/B-C*. Curves corresponding to fractions *A* and *B-C* are marked by arrows.

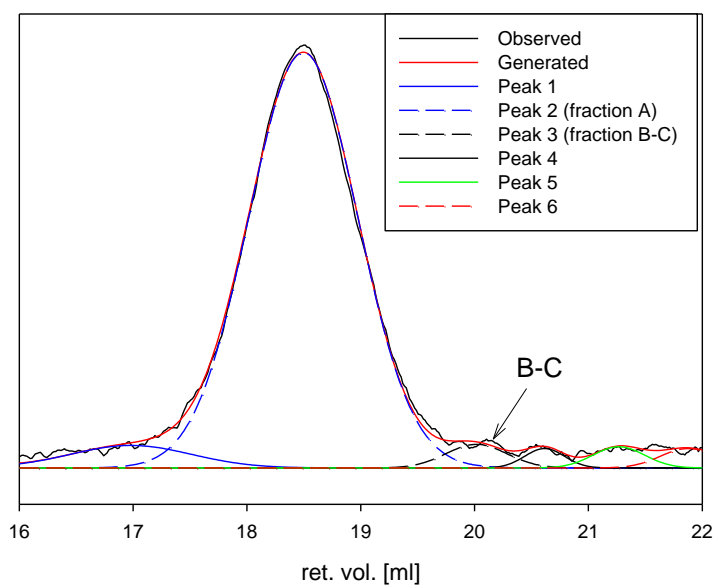

Figure S5. Deconvolution of the RI signal of product *A*. The curve corresponding to fraction *B-C* is marked by an arrow.
